# Supplementary material for: Polyunsaturated fatty acids and their endocannabinoid-related metabolites activity at human TRPV1 and TRPA1 ion channels expressed in HEK-293 cells
Source: PeerJ. 2025 Mar 24;13:e19125. doi: 10.7717/peerj.19125 (PMC11949107; doi:10.7717/peerj.19125)
Supplement: Supplemental Information 5 [file peerj-13-19125-s005.xls]

## Sheet: figure 1 (D)
concentration	Capsaicin	Capsaicin	Capsaicin	Capsaicin	Capsaicin	Capsaicin	Capsaicin	Capsaicin	Capsaicin	Capsaicin	Capsaicin	Capsaicin	EPEA	EPEA	EPEA	EPEA	EPEA	EPEA	DHEA	DHEA	DHEA	DHEA	DHEA	DHEA	γLEA	γLEA	γLEA	γLEA	γLEA	γLEA	2-LG	2-LG	2-LG	2-LG	2-LG	2-LG
-9	6.23589	2.89028	1.79559	10.3317	2.02495	308.34	50.3171	51.1654	4.4283	19.5627	8.46497	57.6325
-8.52288	11.2452	6.93105	3.39704	5.37843	0.994719	335.917	103.111	65.1245	4.36074	61.0751	5.8468	39.7141
-8	5.38512	5.95128	47.2327	7.17478	1.82203	309.776	125.652	333.972	270.42	96.7773	164.958	3.57165
-7.52288	356.845	274.896	259.762	73.7365	34.2854	273.106	132.986	393.207	420.023	111.895	323.852	3.16135
-7	449.588	332.379	480.521	322.808	86.6522	310.081	147.599	431.922	467.245	119.691	406.342	2.43211	7.0578	1.12045	6.0854	9.07354	2.60963	2.86445	5.71762	2.64213	2.58325	2.20924	5.35515	1.54255	0.931854	4.48682	3.74105	0.86494	0.185108	3.24003	0.839195	7.33757	6.80712	12.2096	4.26376	3.99839
-6.52288													3.77264	2.31142	2.07953	9.30994	0.472923	1.05173	7.22383	2.18579	3.68	2.56666	2.83675	6.47843	5.18783	2.35502	8.6025	1.69757	1.3988	2.38651	-0.235531	4.78608	26.5089	15.6203	3.58106	2.27996
-6	464.868	312.706	3.21426	3.20093	3.98773	340.169	187.118	486.026	246.165	165.225	461.65	520.53	2.91304	5.48777	1.31156	9.15064	2.70425	1.48905	82.6736	2.15207	3.01629	2.30911	4.33727	4.33428	179.174	9.16667	5.6781	5.97874	3.40986	2.93357	1.49404	8.29044	4.97117	3.51752	4.17576	6.08272
-5.52288													5.66362	10.8694	3.20924	12.2234	1.07161	3.98229	143.051	24.824	40.8645	14.285	22.6333	69.1812	21.7947	80.3389	37.6766	7.85418	2.34762	95.5783	11.4427	8.3913	3.91155	22.8641	8.0659	6.3713
-5	470.33	171.926	427.551	233.547	218.906	339.94	178.11	253.39	197.967	172.951	473.364	509.446	6.44286	53.2228	9.9712	11.9185	2.5776	3.79282	358.299	237.035	372.804	59.1046	202.763	364.608	408.892	291.398	513.101	87.8703	117.804	243.201	77.397	64.9743	11.4263	68.0539	10.4174	14.0616
-4.52288													12.8698	124.435	117.092	13.2242	28.647	8.81404	421.157	266.746	225.074	238.504	226.816	459.662	350.183	323.986	542.155	300.489	279.486	328.331	94.4158	105.55	25.614	76.6153	45.9507	101.137
-4.3637

## Sheet: figure 1 (E)
concentration	Capsaicin	Capsaicin	Capsaicin	Capsaicin	Capsaicin	Capsaicin	Capsaicin	Capsaicin	Capsaicin	Capsaicin	Capsaicin	Capsaicin	Capsaicin	NADA	NADA	NADA	NADA	NADA	NADA	NADA	AEA	AEA	AEA	AEA	AEA	AEA	2-AG	2-AG	2-AG	2-AG	2-AG	2-AG	2-AG ether	2-AG ether	2-AG ether	2-AG ether	2-AG ether	2-AG ether
-9	6.23589	2.89028	1.79559	10.3317	2.02495	308.34	50.3171	51.1654	4.4283	19.5627	8.46497	2.36878	57.6325
-8.52288	11.2452	6.93105	3.39704	5.37843	0.994719	335.917	103.111	65.1245	4.36074	61.0751	5.8468	1.4546	39.7141
-8	5.38512	5.95128	47.2327	7.17478	1.82203	309.776	125.652	333.972	270.42	96.7773	164.958	149.94
-7.52288	356.845	274.896	259.762	73.7365	34.2854	273.106	132.986	393.207	420.023	111.895	323.852	372.386
-7	449.588	332.379	480.521	322.808	86.6522	310.081	147.599	431.922	467.245	119.691	406.342			1.11659	1.16752	7.20162	12.5727	5.86038	5.74623	7.39324	9.79438	11.1798	5.88892	1.56131	3.70023	2.13522	3.86787	2.53322	1.00748	9.75201	4.94974	2.56299	2.25591	4.12982	8.49887	1.02564	2.71679	1.81343
-6.52288														11.1248	5.91292	9.33147	13.6389	14.8668	-0.419464	7.55531	25.9314	10.5855	2.14091	2.52916	1.6051	-0.193879	2.79918	5.90998	1.13128	13.0737	2.18793	2.21669	3.12063	1.72439	12.4457	2.32641	0.741473	2.16476
-6	464.868	312.706	3.21426	3.20093	3.98773	340.169	187.118	486.026	246.165	165.225	461.65	485.213	520.53	247.562	115.884	22.8559	35.4791	43.0906	7.51548	30.8522	85.0507	18.1779	2.31452	21.1299	4.81994	-0.152455	3.17844	11.4308	1.52443	2.29553	1.50996	5.0359	7.91805	3.6522	9.60469	2.55657	2.90566	1.31398
-5.52288														217.567	143.024	127.072	167.853	12.5805	33.8442	115.466	104.24	119.191	18.6933	67.9069	43.3725	39.8495	1.98177	59.8686	3.62536	7.30363	11.7183	5.76262	16.5791	3.03328	7.57803	1.88806	0.643309	11.7313
-5	470.33	171.926	427.551	233.547	218.906	339.94	178.11	253.39	197.967	172.951	473.364	463.085	509.446	430.183	276.023	328.583	166.574	147.959	167.932	320.102	107.669	250.336	142.845	78.9426	274.449	272.34	7.35741	86.123	26.0517	22.0298	37.7022	3.71463	155.318	30.8581	23.9661	3.17428	0.310281	20.3939
-4.52288														459.861	324.072	33.6755	334.284	21.0574	181.608	362.85	110.333	353.13	181.656	93.5107	312.513	324.288	27.3329	112.734	162.217	44.4524	123.109	0.255928	153.653	87.759	41.6511	12.8054	5.8133	75.505
-4.3637

## Sheet: Figure 2 (A)
concentration	Capsaicin	Capsaicin	Capsaicin	Capsaicin	Capsaicin	Capsaicin	Capsaicin	Capsaicin	EPA	EPA	EPA	EPA	EPA	EPA	DHA	DHA	DHA	DHA	DHA	DHA	GLA	GLA	GLA	GLA	GLA	GLA	1899-12-31 09:03:01	1899-12-31 09:03:01	1899-12-31 09:03:01	1899-12-31 09:03:01	1899-12-31 09:03:01	1899-12-31 09:03:01
-9	19.5627	122.651	6.76854	5.26659	65.3455	10.8255	10.1388	35.8436
-8.52288	61.0751	127.399	12.2423	8.26965	59.6746	9.77605	29.1085	28.7976
-8	96.7773	141.864	312.735	345.351	76.2098	368.076	267.016	319.246
-7.52288	111.895	159.197	418.759	158.659	83.1944	476.755	450.661	349.079
-7	119.691	149.785	483.821	461.679	83.1921	507.895	494.502	415.635	0.297355	4.25684	3.90621	5.16385			8.79309	7.90227	1.12016	9.14548			0.358998	3.08121	4.43882	7.32135	1.04036	2.55253
-6.52288									0.263488	4.77477	5.17872	8.63031			0.110993	3.66484	0.782829	7.55731			-0.630795	4.77279	3.41536	10.3597	1.96604	2.79616	3.09724	3.52596	1.05579	11.2446	3.91119	1.94086
-6	165.225	211.63	351.159	247.922	122.31	532.736	519.757	484.594	-0.175933	6.78316	4.44873	9.08421	5.54222	3.58286	1.53854	8.08091	1.37412	8.45005	6.14814	5.67569	3.89936	2.39237	3.26019	4.99409	2.61412	2.89195	2.16838	2.13327	1.83162	11.3883	6.67317	2.5088
-5.52288									0.307203	10.434	4.67308	8.04162			5.59699	6.86247	1.79767	7.57639			2.0403	1.25669	4.6526	4.70603	2.24837	2.36148	3.72636	2.52773	3.29952	1.38126	3.53952	3.3791
-5	172.951	202.235	472.577	462.537	153.101	535.708	529.643	524.333	7.99333	41.213	9.61004	11.6653	7.67321	15.0259	15.398	14.8517	2.20732	13.9869	10.4035	11.2548	15.417	9.77097	8.53614	10.7081	5.46969	8.30111	18.2692	4.43956	8.46553	15.0126	12.0598	8.02973
-4.52288									19.9806	41.79	35.9904	24.921	28.9142	55.0634	30.4293	29.6434	28.2029	25.9718	28.1927	31.4702	27.0827	92.1911	21.8805	27.2504	40.8812	31.4387	39.549	45.2218	25.2496	24.0779	68.8537	24.9775
-4.3637																											30.4465	62.9714	20.3875	35.8656	74.7484	46.2833
-4
-3.52288
-3

## Sheet: Figure 2(B)
DRGS	Pre-capsaicin	Pre-capsaicin	Pre-capsaicin	Pre-capsaicin	Pre-capsaicin	Pre-capsaicin	Post-capsaicin	Post-capsaicin	Post-capsaicin	Post-capsaicin	Post-capsaicin	Post-capsaicin
HBSS	5.30172	4.70196	4.08947	0.989626	4.05955	3.63987	287.685	237.599	337.866	215.518	217.582	209.537
EPA	16.1107	14.1511	10.793	4.45627	14.6833	13.0981	264.915	237.782	308.835	203.333	227.843	146.783
DHA	15.3316	14.4172	9.22121	4.60105	11.1415	4.87121	325.766	236.554	370.087	262.478	230.552	119.965
GLA	11.5745	14.3439	14.381	3.4398	10.3554	15.8417	316.43	265.849	338.308	270.139	251.245	119.532
1899-12-31 09:03:01	18.6748	8.82738	12.1638	3.71041	11.6736	17.8723	343.398	177.789	360.088	292.864	263.923	139.774
CAPZ	25.3514	3.86652	12.8382	10.4656	4.74187	37.2822	12.9593	-2.66586	6.06891	10.3375	-4.09039	24.8571

## Sheet: Figure 3(D)
concentration	CA	CA	CA	CA	CA	CA	CA	CA	CA	CA	CA	CA	CA	CA	EPEA	EPEA	EPEA	EPEA	EPEA	EPEA	DHEA	DHEA	DHEA	DHEA	DHEA	DHEA	γ-LEA	γ-LEA	γ-LEA	γ-LEA	γ-LEA	γ-LEA	2-LG	2-LG	2-LG	2-LG	2-LG	2-LG
-7.52288
-7															1.24474	5.75137	2.39064	4.16307	4.15311	8.20233	8.58646	11.8101	8.8764	6.20752	4.12277	2.76586	0.773565	1.97114	6.38455	5.07121	2.23484	0.65357	15.3703	7.00661	2.20083			137.719
-6.52288	2.40301	3.84124	13.1494	4.89411	10.2884	14.1967	10.211	9.57762	2.77524	5.3494	3.65955	47.8813	4.992	6.53702	2.46751	7.81636	1.61335	1.7019	8.36601	8.25154	2.97565	11.5941	1.92211	8.31789	8.22054	6.08296	0.57857	1.16695	6.11236	4.17142	1.80738	1.82549	12.1064	3.83181	1.45548			7.527
-6	0.725804	5.14754	1.91589	4.62043	6.92162	15.8258	6.78799	9.2435	2.11321	6.06656	2.68195	40.7863	1.67537	5.98248	2.3186	6.47736	1.9747	2.48916	1.41486	7.40164	2.6845	3.9598	1.66345	5.88163	4.14311	4.30715	2.96329	1.11165	12.1911	2.47996	2.09198	1.74922	12.4294	3.28378	5.40958	5.66199	4.23245	5.17675
-5.52288															6.78921	4.39097	2.79863	3.32801	5.53352	8.24835	2.53347	3.17308	1.45216	10.0203	10.0547	73.8394	5.23707	1.37164	11.2552	5.49439	2.23061	27.0912	11.369	3.55601	1.65722			5.48494
-5	361.959	258.428	173.483	6.11309	368.019	15.6835	91.6134	8.32823	6.06488	30.8624	64.6182	114.009	3.25012	6.21398	250.67	8.98417	4.29865	4.22996	22.2267	8.36165	252.775	33.0558	3.46755	15.2698	63.0111	272.344	11.624	8.01553	83.7476	222.133	100.409	97.3092	11.4202	3.2095	1.99625	7.05459	3.7574	11.3273
-4.52288	261.201	328.281	469.428	117.334	507.712	427.197	302.575	91.2411	120.468	269.938	134.759	294.992	390.773	450.019	345.33	330.592	234.198	185.482	229.324	316.639	349.992	313.567	315.432	199.601	366.143	464.813	346.049	274.809	332.645	317.863	295.869	300.839	12.5375	5.75624	5.69728	4.08001	3.70184	27.8122
-4.3637
-4	465.941	422.86	556.178	443.235	598.589	512.677	412.651	8.27194	242.855	408.124	299.959	470.33
-3.52288	399.171	407.047	570.074	544.405	658.472	579.18	509.178	251.795	292.37	420	326.195	547.612		503.571
-3	406.777	475.841	620.741	568.711	690.623	551.382	560.219	348.734	372.997	396.442	391.125	640.368	560.24	510.534

## Sheet: Figure 3(E)
concentration	CA	CA	CA	CA	CA	CA	CA	CA	CA	CA	CA	CA	CA	CA	AEA	AEA	AEA	AEA	AEA	AEA	2-AG	2-AG	2-AG	2-AG	2-AG	2-AG	2-AG ether	2-AG ether	2-AG ether	2-AG ether	2-AG ether	2-AG ether
-7.52288
-7															11.2147	3.27047	3.33738	2.55791			4.59579	9.25317	10.2641	5.39337	9.27633	4.37911	0.280879	4.87276	5.95893	5.37049	6.74491	2.857
-6.52288	2.40301	3.84124	13.1494	4.89411	10.2884	14.1967	10.211	1.15226	9.57762	2.77524	5.3494	3.65955	4.992	6.53702	9.42891	4.64819	1.23797	3.41441			5.57051	5.90808	5.71157	6.07079	7.25561	4.93584	9.48038	8.5131	4.09991	4.97099	4.35749	3.12533
-6	0.725804	5.14754	1.91589	4.62043	6.92162	15.8258	6.78799	0.910667	9.2435	2.11321	6.06656	2.68195	1.67537	5.98248	11.3796	3.6077	1.68931	3.89257	4.81742	2.41856	6.47733	4.17764	4.8275	2.1815	3.7711	3.33383	11.4488	1.87909	1.22807	4.253	4.55747	3.68404
-5.52288															11.1594	5.43955	3.58064	5.87516			6.15304	3.31413	8.98701	3.00827	4.61466	3.81056	2.26336	3.29511	6.75878	5.88642	11.1841	49.3437
-5	361.959	258.428	173.483	6.11309	368.019	15.6835	91.6134	11.2177	8.32823	6.06488	30.8624	64.6182	3.25012	6.21398	270.188	95.8276	43.3617	6.8753	19.4528	34.7169	4.64019	4.02198	10.3661	3.3919	6.21123	4.73121	6.43905	205.99	4.15604	6.3216	170.328	155.005
-4.52288	261.201	328.281	469.428	117.334	507.712	427.197	302.575	114.651	91.2411	120.468	269.938	134.759	390.773	450.019	380.839	400.035	86.0795	138.88	106.55	121.01	14.9622	7.17927	134.366	9.12688	431.447	54.77	16.8824	397.614	5.37264	104.863	520.454	293.014
-4.3637
-4	465.941	422.86	556.178	443.235	598.589	512.677	412.651	386.358	8.27194	242.855	408.124	299.959
-3.52288	399.171	407.047	570.074	544.405	658.472	579.18	509.178	443.895	251.795	292.37	420	326.195		503.571
-3	406.777	475.841	620.741	568.711	690.623	551.382	560.219	556.411	348.734	372.997	396.442	391.125	560.24	510.534

## Sheet: Figure 4
concentration	CA	CA	CA	CA	CA	CA	CA	CA	EPA	EPA	EPA	EPA	EPA	EPA	DHA	DHA	DHA	DHA	DHA	DHA	GLA	GLA	GLA	GLA	GLA	GLA	1899-12-31 09:03:01	1899-12-31 09:03:01	1899-12-31 09:03:01	1899-12-31 09:03:01	1899-12-31 09:03:01	1899-12-31 09:03:01
-9
-8.52288
-8
-7.52288
-7									5.40731	0.0802918	3.96585	3.10595			8.80867	1.20314	5.56309	5.62124			0.151602	-0.494217	5.21033	2.46213	4.3545	5.72425
-6.52288	14.1967	1.15226	7.19488	7.23891	0.187223	2.19697	47.8813	6.53702	11.1533	1.39174	2.61299	2.72837			7.11212	0.374892	2.03253	5.1389			0.110132	1.01356	7.30774	0.351303	4.28515	9.42083	0.658221	5.88126	1.18664	4.34023	212.72	12.0392
-6	15.8258	0.910667	7.11106	5.07845	4.43841	3.34037	40.7863	5.98248	6.20737	1.84966	3.99368	3.57742	9.65699	3.96131	3.47987	2.00604	3.98505	2.73837	3.1287	4.25533	0.822179	0.0730413	2.06828	3.63693	4.15957	7.0167	6.35791	5.49158	4.04998	4.48522	17.9131	8.13375
-5.52288									4.73145	2.52164	3.12961	3.70301			5.52844	1.55089	4.97348	2.12265			3.24778	2.57837	5.50742	0.907261	7.06939	268.915	1.66148	5.3745	3.9813	5.95445	106.701	11.4367
-5	15.6835	11.2177	12.2148	8.37439	5.08755	2.58385	114.009	6.21398	269.088	17.4998	14.5924	9.88905	12.76	22.7093	508.031	185.633	12.6409	8.19602	18.5259	39.1466	268.343	23.3711	10.7965	8.59005	23.2369	338.225	12.8928	18.4827	8.5101	17.8977	246.374	204.992
-4.52288	427.197	114.651	54.0853	24.6638	241.325	104.319	294.992	450.019	486.394	377.608	117.826	193.269	60.6586	155.376	600.618	528.86	310.75	311.859	419.884	278.355	481.429	335.153	71.3202	67.3187	162.48	414.065	365.915	111.175	80.0015	205.492	439.626	356.36
-4.3637																											481.02	230.074	212.642	309.608	464.93	423.878
-4	512.677	386.358	182.251	90.233	462.503	256.186	470.33
-3.52288	579.18	443.895	314.03	238.126	505.429	366.901	547.612	503.571
-3	551.382	556.411	365.504	376.38	555.064	386.94	640.368	510.534

## Sheet: Figure 5(A)
	PMA	PMA	PMA	Capsaicin post PMA	Capsaicin post PMA	Capsaicin post PMA	HBSS post PMA	HBSS post PMA	HBSS post PMA	Capsaicin	Capsaicin	Capsaicin	HBSS post Capsaicin	HBSS post Capsaicin	HBSS post Capsaicin
PMA
(10 nM)"	8.12826	3.04682	2.7892	64.4162	157.042	126.077	8.22726	-0.285285	4.96768
PMA
(100 nM)"	57.0524	7.39687	49.5032	263.634	178.507	297.323	96.5177	16.207	101.105
PMA
(300 nM)"	86.7592	51.2353	83.7821	310.464	307.302	365.989	103.993	74.6715	86.0703
Capsaicin										226.255	133.384	132.765	14.4552	24.0374	16.1823

## Sheet: Figure 5(C)
concentration	Capsaicin alone	Capsaicin alone	Capsaicin alone	Capsaicin alone	Capsaicin alone	Capsaicin alone	Capsaicin alone	Capsaicin alone	Capsaicin alone	Capsaicin alone	Capsaicin alone	Capsaicin alone	Capsaicin post-PMA	Capsaicin post-PMA	Capsaicin post-PMA	Capsaicin post-PMA	Capsaicin post-PMA	Capsaicin post-PMA	Capsaicin post-PMA	Capsaicin post-PMA	Capsaicin post-PMA	Capsaicin post-PMA	Capsaicin post-PMA
-10								-2.62427	0.210708	-1.10873	5.02093	-0.412494						44.473	19.9944	42.7227	36.7683	31.3318	10.3982
-9	2.49083	6.28801	4.83935	3.5734	0.929816	2.51408	-2.85428	3.18443	5.15178	-0.461211	4.21514	6.61839	41.3533	39.7921	40.9396	31.7003	53.9609	52.809	35.9713	49.984	39.816	29.7359	17.3567
-8.52288	2.13885	10.1781	-5.20128	2.9246	2.50163	16.6604	25.7998	147.975	180.247	1.73413	6.23861	49.459	137.626	123.803	108.674	62.3148	135.616	311.329		67.1431	138.197	73.5753	51.0772
-8			79.3195	30.3097	60.6584	319.686		144.106			105.919	177.189	292.695	167.258	234.279	203.284	320.763	311.597				228.909
-7.52288	532.091	378.009	497.618	498.208	264.188	524.034	489.52	526.489	517.673	453.931	457.847	272.568	396.653	394.172	495.495	292.964	414.324		425.309			371.472
-7	537.437	548.068	557.729	564.127	584.567	101.61	533.123	540.05	540.902		458.607	326.132	458.372	374.744	486.799	539.234			405.184	500.54	449.452	421.453	234.945
-6.52288													474.005
-6	552.521	545.98	564.249	584.634					580.153	565.654		354.62	544.156	380.208	494.359				527.721			402.607	284.086
-5.52288
-5	595.541	626.277	602.254	594.454	590.074	541.046	516.667								496.984		417.588
-4.52288
-4.3637
-4
-3.52288
-3

## Sheet: TRPV1-A1 Raw data
	Drugs alone	Drugs alone	Drugs alone	Drugs alone	Drugs alone	Drugs alone	Drugs alone	Drugs alone	Drugs alone	Drugs post-PMA	Drugs post-PMA	Drugs post-PMA	Drugs post-PMA	Drugs post-PMA	Drugs post-PMA	Drugs post-PMA	Drugs post-PMA	Drugs post-PMA
EPA	7.52548	11.4184	9.76617	10.5311	6.99886	3.47487	2.71618	6.78683	18.8884	49.2015	39.5321			37.0404	36.9714	31.5302		32.9212
DHA	3.98537	5.86749	0	3.83275		0.486557	-0.286024	0.912401	2.20744	50.0906	48.3811	19.3352		66.6517	32.7216	44.0204		2.99063
GLA	9.63089	12.2352	8.42068	4.04585	4.25539	2.8335	8.25768	18.6815	44.3804	44.7315	35.0016	34.9278	29.5327	32.5444	42.846	29.0963		22.7975
1899-12-31 09:03:01	9.94222	3.43716	5.95425	-3.01577	-7.74586	2.90401	2.39417	2.3693	-1.69048		40.3355		41.8572	16.5118	56.2773	40.1538	2.70351	1.93047
Capsaicin				79.3195		30.3097	60.6584				292.695			167.258	234.279	203.284	320.763
